# Supplementary material for: H2O2-Induced Oxidative Stress Affects SO4= Transport in Human Erythrocytes
Source: PLoS One. 2016 Jan 8;11(1):e0146485. doi: 10.1371/journal.pone.0146485 (PMC4712827; doi:10.1371/journal.pone.0146485)
Supplement: S1 Text — (PDF) [file pone.0146485.s001.pdf]

Modica, Ragusa 15 Maggio 2015

*A chi di competenza*

Il sottoscritto dott. Pietro Romano, dirigente medico presso l'Unità Operativa di Patologia Clinica dell'Ospedale Maggiore di Modica (Ragusa, Italia), Azienda Provinciale Sanitaria Ragusa,

dichiara

di essere autorizzato al prelievo di campioni di sangue umano, in accordo alle linee guida del comitato etico locale.

In fede

Pietro Romano, MD  
Dirigente medico U.O. Patologia Clinica  
Ospedale Maggiore Modica (Ragusa)  
ASP Ragusa Italy  
Tel +39.328 2631367

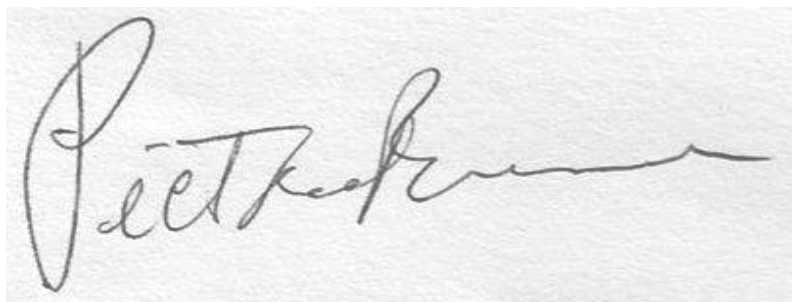A handwritten signature in black ink on a light-colored background. The signature is written in a cursive style, starting with a large, looped 'P' and ending with a long, horizontal flourish.
